# Supplementary material
Source: publisher figshare collection journal article supplement (https://tandf.figshare.com/articles/dataset/_/6294995)
Supplement: Supplementary file 1 [file 2]

Archive with 2 entries (2 files):
- Code.zip
- SupplementaryMaterial.pdf
